# Supplementary material for: The association between FABP7 serum levels with survival and neurological complications in acetaminophen-induced acute liver failure: a nested case–control study
Source: Springer Nature journal article supplement (doi:10.1186/s13613-017-0323-0), 2017-10-05

# APAP-ALF patients in ALFSG registry as of January 1, 2015

N = 1027

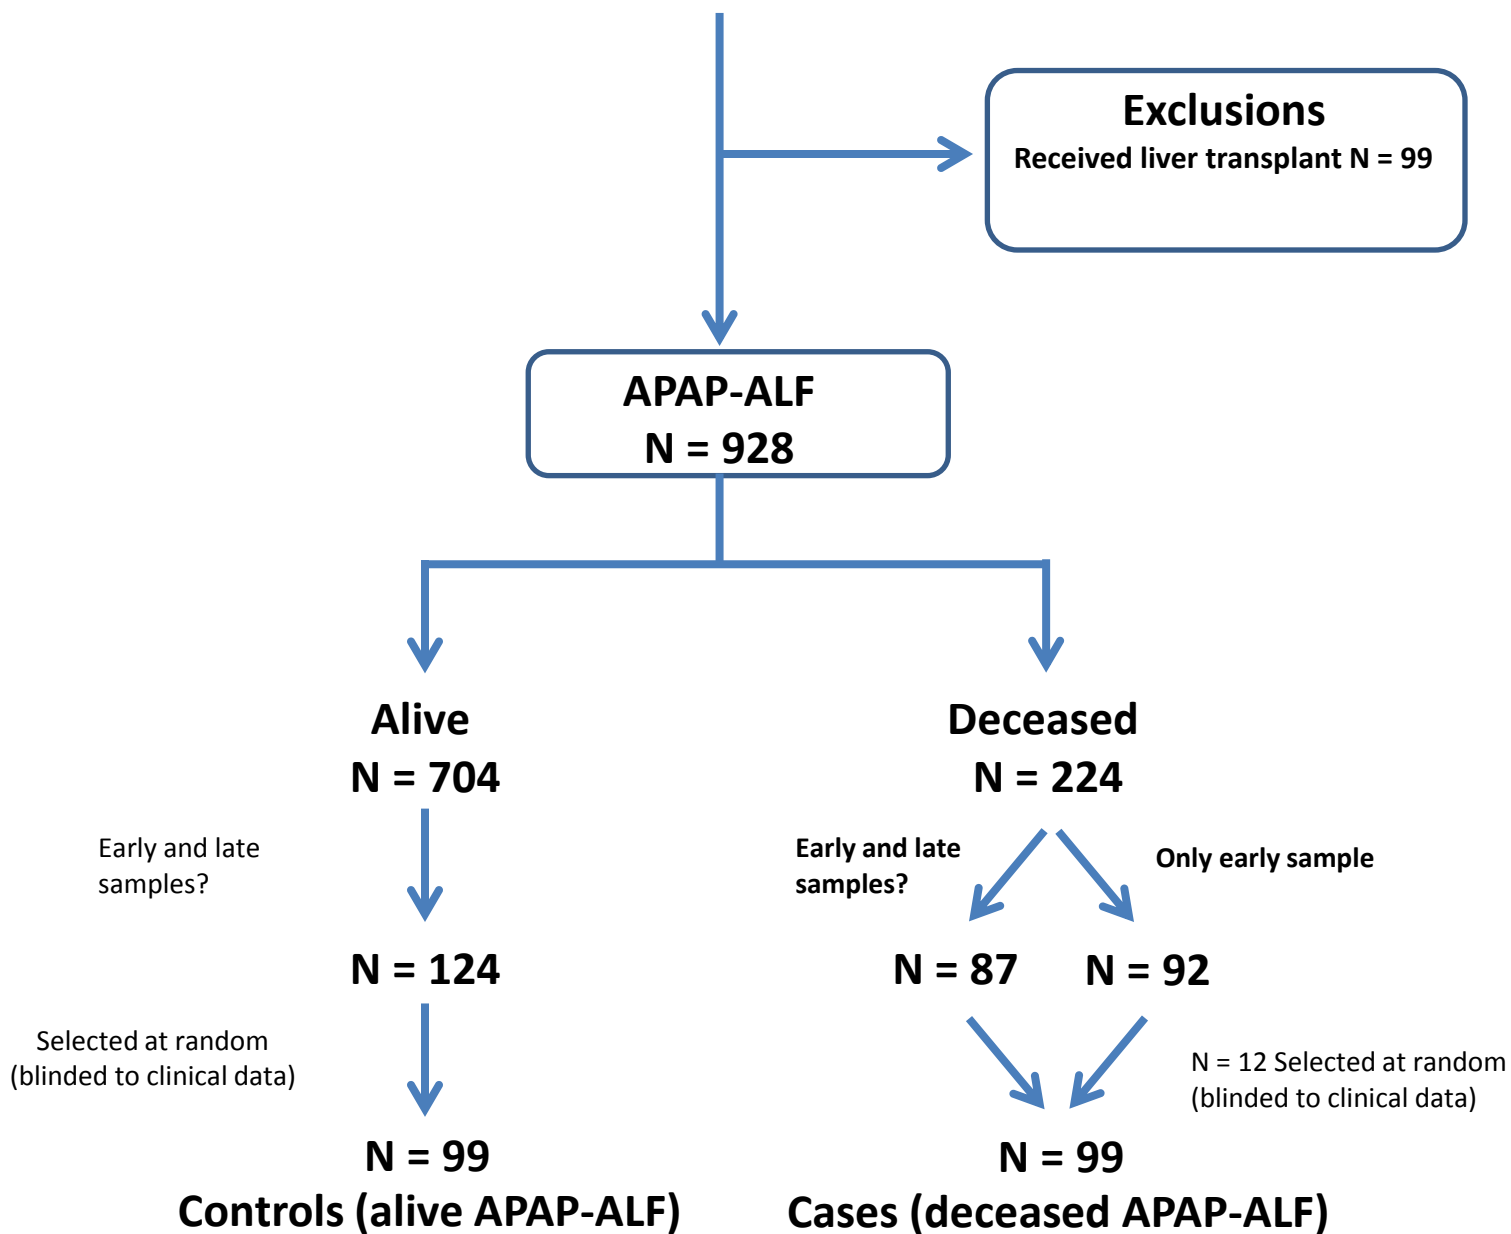

Supplement: MOESM1 [file 15111678]
